# Supplementary material for: Common Variants in Maturity-Onset Diabetes of the Young Genes and Future Risk of Type 2 Diabetes
Source: Oxford University Press journal article supplement (doi:10.2337/db06-1464), 2008-03-11
Supplement: db06-1464online_appendix.doc [file db06-1464online_appendix.doc]

Online appendix 1: Primer and Probe sequences

| Taqman Primers and Probes | | | | | |
| --- | --- | --- | --- | --- | --- |
| Gene | Polymorphism | Primer 1 | Primer 2 | Probe 1 | Probe 2 |
| HNF-4 | rs4810424 | AGCAGTCCTCCTTCCAAGGT | CTGGGTAGGGTGGCTCAC | AAAGTGCTGGGATTAC | AGTGCTGCGATTAC |
|  | rs1884614 | CTCAGAGCAGGGTGTAACTTACC | GAGCCGAGGAAGCAGGAA | AAAGACAAGCTGTGCAGC | AAAGACAAGCTATGCAGC |
|  | rs2144908 | GCATTGCAAAGACACAATCAACATTT | GATCAGGCCCTGATTCTGTCAT | TCCCTGGCCCTCTGT | TCCCTGGCTCTCTGT |
|  | rs6103716 | GTTTGTGAAGGAGCAGGTCAGA | TCTCCCCACCTCCTCTGC | CCTGTTTTGACAACTT | CTGTTTGGACAACTT |
|  | rs3212198 | GAGGCCGAGGCTTCTCAAA | ACAGTGTCCCAATGTGCAGTATTAA | AATCTTGCCGAAGGAG | TCTTGCCAAAGGAG |
| GCK | rs758989 | CCCTTGGGTCAGAGTTTAAGACATG | CACCTAGTCTGTCTCCTTAAAACACAG | TCTGCCGTAAATCA | TCTGCCATAAATCA |
|  | rs1303722 | GGATGATAGATCACTTAAGGGCAGAGA | TCTGACCTTGGTGCCCAATATG | TGCTTCTGATATGCTTCT | CTTCTGATGTGCTTCT |
|  | rs1799884 | GCCACTCCTGGTCACCAT | GATTCTCCTGCCAGGGCTT | CCTCTCAGGAGCACAGT | CCTCTCAGGAACACAGT |
| *HNF-1* | rs3110641 | ATGACCCTGCCAAATGACACA | GTAGAGGACACTGCAGAGAGAGA | CTGAGCACCCTCTCT | CTGAGCACTCTCTCT |

Online appendix 1: Primers and probes used for Taqman genotyping. The polymorphic base in the Taqman probe is underlined.

Online appendix 2: D’ and r2 values for *HNF-4, GCK* and *HNF-1* SNPs in the Botnia and MPP prospective cohorts.

|  | **Gene** | **SNP** | **SNP** | **D’** | **r2** |
| --- | --- | --- | --- | --- | --- |
| **Botnia** | TCF14 | rs4810424 | rs1884614 | 0.998 | 0.997 |
|  |  | rs4810424 | rs2144908 | 1 | 0.982 |
|  |  | rs4810424 | rs6103716 | 0.543 | 0.109 |
|  |  | rs4810424 | rs2425637 | 0.235 | 0.011 |
|  |  | rs4810424 | rs3212198 | 0.134 | 0.004 |
|  |  | rs1884614 | rs2144908 | 1 | 0.983 |
|  |  | rs1884614 | rs6103716 | 0.546 | 0.11 |
|  |  | rs1884614 | rs2425637 | 0.236 | 0.011 |
|  |  | rs1884614 | rs3212198 | 0.131 | 0.004 |
|  |  | rs2144908 | rs6103716 | 0.547 | 0.113 |
|  |  | rs2144908 | rs2425637 | 0.223 | 0.01 |
|  |  | rs2144908 | rs3212198 | 0.133 | 0.004 |
|  |  | rs6103716 | rs2425637 | 0.383 | 0.079 |
|  |  | rs6103716 | rs3212198 | 0.187 | 0.018 |
|  |  | rs2425637 | rs3212198 | 0.035 | 0.001 |
|  |  |  |  |  |  |
|  | GCK | rs758989 | rs2244164 | 0.998 | 0.991 |
|  |  | rs758989 | rs1303722 | 0.992 | 0.97 |
|  |  | rs758989 | rs1799884 | 0.531 | 0.038 |
|  |  | rs2244164 | rs1303722 | 0.997 | 0.979 |
|  |  | rs2244164 | rs1799884 | 0.496 | 0.034 |
|  |  | rs1303722 | rs1799884 | 0.523 | 0.037 |
|  |  |  |  |  |  |
| **MPP** | TCF14 | rs4810424 | rs6103716 | 0.419 | 0.074 |
|  |  | rs4810424 | rs2425637 | 0.21 | 0.009 |
|  |  | rs4810424 | rs3212198 | 0.103 | 0.003 |
|  |  | rs6103716 | rs2425637 | 0.574 | 0.152 |
|  |  | rs6103716 | rs3212198 | 0.319 | 0.035 |
|  |  | rs2425637 | rs3212198 | 0.074 | 0.004 |
|  |  |  |  |  |  |
|  | GCK | rs758989 | rs2244164 | 0.995 | 0.98 |
|  |  | rs758989 | rs1303722 | 0.995 | 0.98 |
|  |  | rs758989 | rs1799884 | 0.572 | 0.054 |
|  |  | rs2244164 | rs1303722 | 1 | 0.999 |
|  |  | rs2244164 | rs1799884 | 0.57 | 0.053 |
|  |  | rs1303722 | rs1799884 | 0.565 | 0.053 |
|  |  |  |  |  |  |
|  | TCF2 | rs3110641 | rs1008284 | 0.022 | 0 |
|  |  | rs3110641 | rs757210 | 0.163 | 0.004 |
|  |  | rs1008284 | rs757210 | 0.172 | 0.005 |

Online appendix 3: Genotype counts Botnia prospective cohort and Malmö Preventive Project

|  |  |  | **Botnia Prospective** | | **Malmö Preventive Project** | |
| --- | --- | --- | --- | --- | --- | --- |
| Gene |  |  | Non-converters | Converters | Non-converters | Converters |
| HNF-4 (*TCF14*) | rs4810424 | CC | 70 | 8 | 379 | 63 |
| CG | 596 | 37 | 3,634 | 530 |
| GG | 1,455 | 86 | 8,909 | 1,260 |
| rs1884614 | TT | 71 | 8 | --- | --- |
| TC | 593 | 37 | --- | --- |
| CC | 1,456 | 84 | --- | --- |
| rs2144908 | AA | 74 | 8 | --- | --- |
| AG | 598 | 38 | --- | --- |
| GG | 1,445 | 84 | --- | --- |
| rs6103716 | TT | 863 | 45 | 6,091 | 818 |
| TC | 985 | 65 | 5,922 | 824 |
| CC | 278 | 21 | 1,479 | 197 |
| rs2425637 | GG | 472 | 30 | 3,034 | 503 |
| GT | 1,004 | 57 | 6,403 | 908 |
| TT | 554 | 37 | 3,425 | 440 |
| rs3212198 | CC | 441 | 31 | 2,305 | 336 |
| CT | 1,080 | 69 | 6,569 | 882 |
| TT | 598 | 27 | 4,653 | 627 |
| GCK | rs758989 | GG | 544 | 29 | 3,017 | 404 |
| GA | 1,038 | 59 | 6,799 | 958 |
| AA | 534 | 40 | 3,698 | 482 |
| rs2244164 | TT | 485 | 35 | 3,726 | 484 |
| TC | 894 | 50 | 6,817 | 962 |
| CC | 504 | 22 | 2,976 | 401 |
| rs1303722 | AA | 535 | 29 | 2,845 | 404 |
| AG | 1,032 | 62 | 6,512 | 964 |
| GG | 542 | 39 | 3,574 | 489 |
| rs1799884 | AA | 24 | 3 | 335 | 41 |
| AG | 455 | 25 | 3,382 | 470 |
| GG | 1,626 | 103 | 9,197 | 1,346 |
| HNF-1 (*TCF2*) | rs3110641 | TT | 69 | 3 | 8,131 | 1,213 |
| TC | 580 | 35 | 4,046 | 559 |
| CC | 1,480 | 91 | 510 | 83 |
| rs1008284 | AA | --- | --- | 797 | 87 |
| AG | --- | --- | 4,985 | 710 |
| GG | --- | --- | 7,785 | 1,052 |
| rs757210 | TT | --- | --- | 1,694 | 273 |
| TC | --- | --- | 5,326 | 760 |
| CC | --- | --- | 4,818 | 699 |
| TG | --- | --- | 245 | 31 |
| CG | --- | --- | 395 | 58 |
| GG | --- | --- | 4 | 2 |
| *HNF-1* (*TCF1*) | rs1169288 | AA | --- | --- | 5,989 | 781 |
| AC | --- | --- | 5,605 | 836 |
| CC | --- | --- | 1,328 | 235 |

Rs757210 is tri-allelic and was analysed as T vs C+G. --- failed genotyping. As a validation of Malmö Preventive Project (MPP) rs1169288 was genotyped, and in concordance with our previous results (Holmkvist et al. Diabetologia 49:2882-2891, 2006) this variant significantly increases the risk of future T2D in the MPP sample (hazard ratio (HR)=1.2 (1.1-1.3), p=0.0002).

Online appendix 4: Mean phenotype values ± SE

|  | | | **Baseline visit (Botnia)** | | | | | | | **Last visit Botnia** | **Baseline visit MPP** | **Last visit MPP** | **Baseline visit Botnia + MPP** | **Last visit Botnia + MPP** |
| --- | --- | --- | --- | --- | --- | --- | --- | --- | --- | --- | --- | --- | --- | --- |
| Gene | SNP |  | fIns | Ins120 | HOMA | I/G30 | DI | fPG | G120 | fPG | fPG | fPG | fPG | fPG |
| HNF-4 (*TCF14*) | rs4810424 | CC | 5.35 ± 0.1 | 37.4 ± 1.0 | 1.35 ± 0.03 | 5.23 ± 0.1 | 4.60 ± 0.1 | 5.57 ± 0.01 | 6.29 ± 0.04 | 5.31 ± 0.02 | 5.53 ± 0.007 | 5.83 ± 0.01 | 5.46 ± 0.005 | 5.72 ± 0.07 |
| CG | 5.38 ± 0.2 | 38.6 ± 1.6 | 1.33 ± 0.04 | 5.16 ± 0.2 | 4.68 ± 0.1 | 5.54 ± 0.02 | 6.25 ± 0.06 | 5.29 ± 0.02 | 5.51 ± 0.01 | 5.84 ± 0.02 | 5.44 ± 0.008 | 5.76 ± 0.02 |
| GG | 5.16 ± 0.4 | 36.1 ± 4.5 | 1.31 ± 0.1 | 5.28 ± 0.5 | 4.68 ± 0.4 | 5.59 ± 0.07 | 6.48 ± 0.2 | 5.30 ± 0.06 | 5.55 ± 0.04 | 5.80 ± 0.08 | 5.44 ± 0.03 | 5.76 5 ± 0.01 |
| rs1884614 | TT | 5.35 ± 0.09 | 37.4 ± 1.0 | 1.35 ± 0.03 | 5.24 ± 0.1 | 4.61 ± 0.1 | 5.57 ± 0.01 | 6.30 ± 0.04 | 5.31 ± 0.01 | --- | --- | --- | --- |
| TC | 5.38 ± 0.2 | 38.5 ± 1.6 | 1.35 ± 0.04 | 5.17 ± 0.2 | 4.69 ± 0.2 | 5.55 ± 0.02 | 6.24 ± 0.04 | 5.29 ± 0.02 | --- | --- | --- | --- |
| CC | 5.17 ± 0.4 | 35.9 ± 4.5 | 1.31 ± 0.1 | 5.23 ± 0.5 | 4.63 ± 0.4 | 5.59 ± 0.06 | 6.48 ± 0.2 | 5.31 ± 0.06 | --- | --- | --- | --- |
| rs2144908 | AA | 5.36 ± 0.1 | 37.4 ± 1.0 | 1.35 ± 0.03 | 5.23 ± 0.1 | 4.60 ± 0.1 | 5.57 ± 0.01 | 6.30 ± 0.04 | 5.32 ± 0.02 | --- | --- | --- | --- |
| AG | 5.36 ± 0.2 | 38.2 ± 1.6 | 1.34 ± 0.04 | 5.16 ± 0.2 | 4.69 ± 0.2 | 5.54 ± 0.02 | 6.24 ± 0.06 | 5.29 ± 0.02 | --- | --- | --- | --- |
| GG | 5.27 ± 0.4 | 37.8 ± 4.4 | 1.34 ± 0.1 | 5.28 ± 0.5 | 4.57 ± 0.4 | 5.60 ± 0.06 | 6.52 ± 0.2 | 5.30 ± 0.06 | --- | --- | --- | --- |
| rs6103716 | TT | 5.45 ± 0.1 | 36.8 ± 1.4 | 1.38 ± 0.03 | 5.27 ± 0.1 | 4.67 ± 0.1 | 5.58 ± 0.02 | 6.28 ± 0.05 | 5.35 ± 0.02 | 5.52 ± 0.008 | 5.82 ± 0.02 | 5.44 ± 0.007 | 5.76 ± 0.02 |
| TC | 5.25 ± 0.1 | 38.2 ± 1.2 | 1.31 ± 0.03 | 5.19 ± 0.1 | 4.60 ± 0.1 | 5.55 ± 0.02 | 6.26 ± 0.05 | 5.28 ± 0.02 | 5.52 ± 0.008 | 5.83 ± 0.02 | 5.45 ± 0.007 | 5.76 ± 0.02 |
| CC | 5.40 ± 0.2 | 37.8 ± 2.4 | 1.36 ± 0.06 | 5.08 ± 0.3 | 4.60 ± 0.2 | 5.56 ± 0.03 | 6.41 ± 0.09 | 5.29 ± 0.03 | 5.52 ± 0.02 | 5.86 ± 0.04 | 5.44 ± 0.01 | 5.77 ± 0.03 |
| rs2425637 | GG | 5.34 ± 0.2 | 37.4 ± 1.8 | 1.33 ± 0.05 | 5.43 ± 0.2 | 4.70 ± 0.2 | 5.57 ± 0.03 | 6.27 ± 0.07 | 5.34 ± 0.03 | 5.54 ± 0.01 | 5.86 ± 0.03 | 5.45 ± 0.009 | 5.79 ± 0.02 |
| GT | 5.41 ± 0.1 | 37.8 ± 1.2 | 1.36 ± 0.03 | 5.34 ± 0.1 | 4.72 ± 0.1 | 5.56 ± 0.02 | 6.27 ± 0.05 | 5.31 ± 0.02 | 5.53 ± 0.009 | 5.83 ± 0.02 | 5.45 ± 0.007 | 5.76 ± 0.02 |
| TT | 5.30 ± 0.2 | 37.8 ± 1.6 | 1.34 ± 0.04 | 4.88 ± 0.2 | 4.43 ± 0.2 | 5.57 ± 0.02 | 6.38 ± 0.07 | 5.27 ± 0.03 | 5.51 ± 0.01 | 5.80 ± 0.02 | 5.45 ± 0.009 | 5.72 ± 0.02 |
| rs3212198 | CC | 5.10 ± 0.2 | 38.0 ± 1.8 | 1.28 ± 0.05 | 5.31 ± 0.2 | 4.86 ± 0.2 | 5.58 ± 0.03 | 6.35 ± 0.07 | 5.31 ± 0.03 | 5.50 ± 0.01 | 5.81 ± 0.03 | 5.44 ± 0.01 | 5.73 ± 0.03 |
| CT | 5.37 ± 0.1 | 37.3 ± 1.2 | 1.35 ± 0.03 | 5.13 ± 0.1 | 4.60 ± 0.1 | 5.56 ± 0.02 | 6.28 ± 0.05 | 5.30 ± 0.02 | 5.53 ± 0.008 | 5.86 ± 0.02 | 5.46 ± 0.006 | 5.78 ± 0.02 |
| TT | 5.53 ± 0.2 | 38.0 ± 1.6 | 1.39 ± 0.04 | 5.31 ± 0.2 | 4.48 ± 0.2 | 5.57 ± 0.02 | 6.27 ± 0.06 | 5.33 ± 0.02 | 5.50 ± 0.009 | 5.81 ± 0.02 | 5.43 ± 0.007 | 5.75 ± 0.02 |
| GCK | rs758989 | GG | 5.20 ± 0.2 | 37.5 ± 1.7 | 1.29 ± 0.04 | 5.24 ± 0.2 | 4.66 ± 0.2 | 5.53 ± 0.02 | 6.26 ± 0.07 | 5.28 ± 0.02 | 5.50 ± 0.01 | 5.81 ± 0.03 | 5.43 ± 0.009 | 5.73 ± 0.02 |
| GA | 5.39 ± 0.1 | 38.4 ± 1.2 | 1.36 ± 0.03 | 5.29 ± 0.1 | 4.66 ± 0.1 | 5.59 ± 0.02 | 6.30 ± 0.05 | 5.30 ± 0.02 | 5.52 ± 0.008 | 5.83 ± 0.02 | 5.45 ± 0.006 | 5.76 ± 0.02 |
| AA | 5.37 ± 0.1 | 36.8 ± 1.7 | 1.35 ± 0.04 | 5.09 ± 0.2 | 4.54 ± 0.2 | 5.56 ± 0.02 | 6.32 ± 0.07 | 5.33 ± 0.02 | 5.54 ± 0.01 | 5.85 ± 0.02 | 5.46 ± 0.009 | 5.78 ± 0.02 |
| rs2244164 | TT | 5.43 ± 0.2 | 36.2 ± 1.8 | 1.37 ± 0.04 | 4.98 ± 0.2 | 4.39 ± 0.2 | 5.57 ± 0.02 | 6.30 ± 0.03 | 5.34 ± 0.03 | 5.54 ± 0.01 | 5.84 ± 0.02 | 5.42 ± 0.01 | 5.79 ± 0.02 |
| TC | 5.47 ± 0.1 | 39.5 ± 1.3 | 1.39 ± 0.03 | 5.23 ± 0.1 | 4.61 ± 0.1 | 5.60 ± 0.02 | 6.34 ± 0.05 | 5.31 ± 0.02 | 5.51 ± 0.008 | 5.83 ± 0.02 | 5.44 ± 0.006 | 5.77 ± 0.02 |
| CC | 5.11 ± 0.2 | 36.8 ± 1.8 | 1.27 ± 0.05 | 5.13 ± 0.2 | 4.61 ± 0.2 | 5.53 ± 0.03 | 6.26 ± 0.07 | 5.28 ± 0.02 | 5.50 ± 0.01 | 5.82 ± 0.03 | 5.46 ± 0.009 | 5.74 ± 0.02 |
| rs1303722 | AA | 5.12 ± 0.2 | 36.3 ± 1.7 | 1.28± 0.04 | 5.17 ± 0.2 | 4.64 ± 0.2 | 5.54 ± 0.02 | 6.25 ± 0.07 | 5.28 ± 0.02 | 5.51 ± 0.01 | 5.81 ± 0.03 | 5.44 ± 0.01 | 5.73 ± 0.02 |
| AG | 5.45 ± 0.1 | 38.0 ± 1.2 | 1.38 ± 0.03 | 5.25 ± 0.1 | 4.66 ± 0.1 | 5.58 ± 0.02 | 6.30 ± 0.05 | 5.31 ± 0.02 | 5.53 ± 0.008 | 5.83 ± 0.02 | 5.45 ± 0.006 | 5.76 ± 0.02 |
| GG | 5.40 ± 0.2 | 37.9 ± 1.7 | 1.35 ± 0.04 | 5.13 ± 0.2 | 4.54 ± 0.2 | 5.56 ± 0.02 | 6.31 ± 0.07 | 5.33 ± 0.02 | 5.55 ± 0.01 | 5.85 ± 0.02 | 5.47 ± 0.009 | 5.78 ± 0.02 |
| rs1799884 | GG | 5.37 ± 0.09 | 38.2 ± 1.0 | 1.35 ± 0.02 | 5.25 ± 0.1 | 4.64 ± 0.09 | 5.55 ± 0.01 | 6.28 ± 0.04 | 5.30 ± 0.01 | 5.52 ± 0.007 | 5.80 ± 0.08 | 5.44 ± 0.005 | 5.75 ± 0.01 |
| GA | 5.24 ± 0.2 | 35.4 ± 1.9 | 1.32 ± 0.05 | 5.09 ± 0.2 | 4.68 ± 0.2 | 5.60 ± 0.03 | 6.33 ± 0.07 | 5.33 ± 0.03 | 5.56 ± 0.01 | 5.83 ± 0.02 | 5.48 ± 0.009 | 5.77 ± 0.02 |
| AA | 6.70 ± 0.7 | 44.9 ± 7.9 | 1.81 ± 0.2 | 5.72 ± 0.9 | 3.46 ± 0.7 | 6.10 ± 0.1 | 6.69 ± 0.3 | 5.57 ± 0.08 | 5.56 ± 0.03 | 5.82 ± 0.01 | 5.51 ± 0.03 | 5.79 ± 0.07 |
| HNF-1 (*TCF2*) | rs3110641 | TT | 5.40 ± 0.1 | 38.1 ± 1.0 | 1.36 ± 0.03 | 5.20 ± 0.1 | 4.60 ± 0.1 | 5.56 ± 0.01 | 6.32 ± 0.04 | 5.36 ± 0.07 | 5.54 ± 0.03 | 5.83 ± 0.06 | 5.46 ± 0.02 | 5.77 ± 0.06 |
| TC | 5.24 ± 0.2 | 36.6 ± 1.6 | 1.32 ± 0.04 | 5.28 ± 0.2 | 4.70 ± 0.2 | 5.57 ± 0.02 | 6.23 ± 0.06 | 5.30 ± 0.02 | 5.52 ± 0.009 | 5.84 ± 0.02 | 5.45 ± 0.008 | 5.77 ± 0.02 |
| CC | 5.48 ± 0.4 | 41.0 ± 4.8 | 1.37 ± 0.1 | 5.37 ± 0.5 | 4.94 ± 0.5 | 5.60 ± 0.07 | 6.13 ± 0.2 | 5.31 ± 0.01 | 5.53 ± 0.008 | 5.82 ± 0.02 | 5.45 ± 0.006 | 5.74 ± 0.01 |

Online appendix 4: Mean ± SE phenotype levels at genotype level for the different SNPs. Raw data is presented. Fasting plasma glucose (fPG) show a marginal decrease over time in the Botnia prospective cohort and for comparison we present fPG from basal and last visits for both our study cohorts Botnia and MPP as well as the combination of the two.

Online appendix 5: Previous case-control results from our Scandinavian samples of the genes investigated in the present study.

|  |  |  |  | | Diabetes Genetics Initiative | Winckler (2005) | Winckler (2007) | Present study | |
| --- | --- | --- | --- | --- | --- | --- | --- | --- | --- |
| Locus | Chromosome | SNP | Minor allele | Major allele | p-value | p-value | p-value | p-value  Botnia / MPP | |
| HNF-4 | 20 | **rs4810424** | C | G | --- | --- | --- | 0.04 | 0.10 |
| 20 | rs1884613 | G | C | --- | 0.05 | 0.05 | 0.04 | --- |
| 20 | **rs2144908** | A | G | --- | 0.12 | --- | 0.06 | --- |
| 20 | **rs6103716** | G | T | --- | --- | --- | 0.20 | 0.60 |
| 20 | **rs2425637** | G | T | --- | --- | --- | 0.90 | 0.90 |
| 20 | rs11574730 | A | G | 0.52 | --- | --- | --- | --- |
| 20 | rs6031580 | A | G | 0.25 | --- | --- | --- | --- |
| 20 | rs2071199 | C | T | 0.30 | --- | --- | --- | --- |
| 20 | rs6031579 | G | C | 0.66 | --- | --- | --- | --- |
| 20 | **rs3212198** | C | T | 0.04 | --- | --- | 0.10 | 0.10 |
| 20 | rs717248 | C | T | 0.14 | --- | --- | --- | --- |
| 20 | rs1028583 | T | G | 0.06 | 0.15 | --- | --- | --- |
| 20 | rs2425639 | A | G | 0.17 | --- | --- | --- | --- |
| 20 | rs6031601 | C | A | 0.11 | --- | --- | --- | --- |
| 20 | rs4812831 | A | G | 0.24 | --- | --- | --- | --- |
| 20 | rs4812828 | C | T | --- | 0.42 | --- | --- | --- |
| 20 | rs4364072 | G | A | --- | 0.71 | --- | --- | --- |
| 20 | rs3092370 | A | G | --- | 0.62 | --- | --- | --- |
| 20 | rs1800963 | A | C | --- | 0.92 | --- | --- | --- |
| 20 | rs1885088 | A | G | --- | 0.22 | --- | --- | --- |
| 20 | rs1800961 (T130I) | T | A | --- | 0.58 | --- | --- | --- |
| 20 | rs3818247 | G | T | --- | 0.35 | --- | --- | --- |
| 20 | rs3212184 | G | C | --- | 0.74 | --- | --- | --- |
| GCK | 7 | rs10951757 | A | G | --- | --- | 0.07 | --- | --- |
| 7 | rs2284779 | C | T | --- | --- | 0.04 | --- | --- |
| 7 | **rs1303722** | T | C | 0.02 | --- | --- | 0.70 | 0.60 |
| 7 | rs17832252 | T | G | 0.56 | --- | --- | --- | --- |
| 7 | **rs1799884a** | T | C | 0.10 | --- | 0.07 | 0.30 | 0.20 |
| 7 | rs2300586 | A | G | 0.29 | --- | --- | --- | --- |
| 7 | **rs758989** | C | T | 0.01 | --- | --- | 0.06 | 0.90 |
| *HNF-1* (*TCF1*) | 12 | rs2649999 | C | T | --- | --- | 0.07 | --- | --- |
| 12 | rs2701175 | A | C | --- | --- | 0.006 | --- | --- |
| 12 | rs1920792 | T | C | --- | --- | 0.002 | --- | --- |
| 12 | rs1169289 | G | C | --- | --- | 0.04 | --- | --- |
| 12 | rs1169288 (I27L) | T | G | --- | --- | 0.02 | --- | 0.0002 |
| 12 | rs1169292 | T | C | --- | --- | 0.08 | --- | --- |
| 12 | rs735396 | A | G | --- | --- | 0.03 | --- | --- |
| *HNF-1* (*TCF2*) | 17 | rs11263755 | A | G | --- | --- | 0.08 | --- | --- |
| 17 | rs2285741 | A | G | 0.56 | --- | 0.08 | --- | --- |
| 17 | **rs3110641** | C | T | --- | --- | 0.009 | 0.70 | 0.30 |
| 17 | rs1859211 | C | T | --- | --- | 0.1 | --- | --- |
| 17 | rs3110640 | C | T | --- | --- | 0.04 | --- | --- |
| 17 | **rs757210** | A | G+C | --- | --- | 0.000005b | --- | 0.90 |
| 17 | rs3094513 | T | C | --- | --- | 0.02 | --- | --- |
| 17 | rs2689 | A | T | --- | --- | 0.06 | --- | --- |
| 17 | rs8075185 | T | C | 0.11 | --- | --- | --- | --- |
| 17 | rs1985643 | C | T | 0.37 | --- | --- | --- | --- |
| 17 | rs11263756 | A | G | 0.19 | --- | --- | --- | --- |
| 17 | rs3110648 | G | T | 0.15 | --- | --- | --- | --- |
| 17 | rs2269844 | A | G | 0.15 | --- | --- | --- | --- |
| 17 | rs2189303 | A | G | 0.33 | --- | --- | --- | --- |
| 17 | SNP_A-2242850 | C | G | 0.78 | --- | --- | --- | --- |
| 17 | rs17138469 | C | G | 0.58 | --- | --- | --- | --- |
| 17 | rs2107131 | A | G | 0.31 | --- | --- |  | --- |
| 17 | rs2074430 | T | C | 0.24 | --- | --- |  |  |
| 17 | rs11656817 | G | A | 0.30 | --- | --- |  |  |
| 17 | rs11868513 | A | G | 0.12 | --- | --- |  |  |

Online appendix 5: SNPs in the *HNF-4, GCK* and *HNF-1* genes that previously have been genotyped in our population (Diabetes Genetics Initiative of Broad Institute of Harvard and MIT, Lund University and Novartis, *Science* 316:1331-1336, 2007; Winckler W. *Diabetes* 54:886-892, 2005 and Winckler W. *Diabetes* 56:685-693, 2007). Bold SNPs are investigated in this study and p-values are from survival analyses. a rs1799884 was tested by perfect proxy rs730497 in Winckler W. *Diabetes* 56:685-693, 2007. b p-value from combined analysis of three different studies.
